# Supplementary material for: Direct preparation and conversion of copper hydroxide-based monolithic xerogels with hierarchical pores
Source: Royal Society of Chemistry journal article supplement (doi:10.1039/c5nj00479a), 2015-01-01
Supplement: c5nj00479a1.pdf [file c5nj00479a1.pdf]

Electronic Supplementary Information

## Direct preparation and conversion of copper-based monolithic xerogels with hierarchical pores

Shotaro Fukumoto,<sup>a</sup> Kazuki Nakanishi<sup>\*a</sup> and Kazuyoshi Kanamori<sup>a</sup>

<sup>a</sup> Department of Chemistry, Graduate School of Science, Kyoto University,  
Kitashirakawa, Sakyo-ku, Kyoto 606-8502, Japan

\*E-mail: kazuki@kuchem.kyoto-u.ac.jp

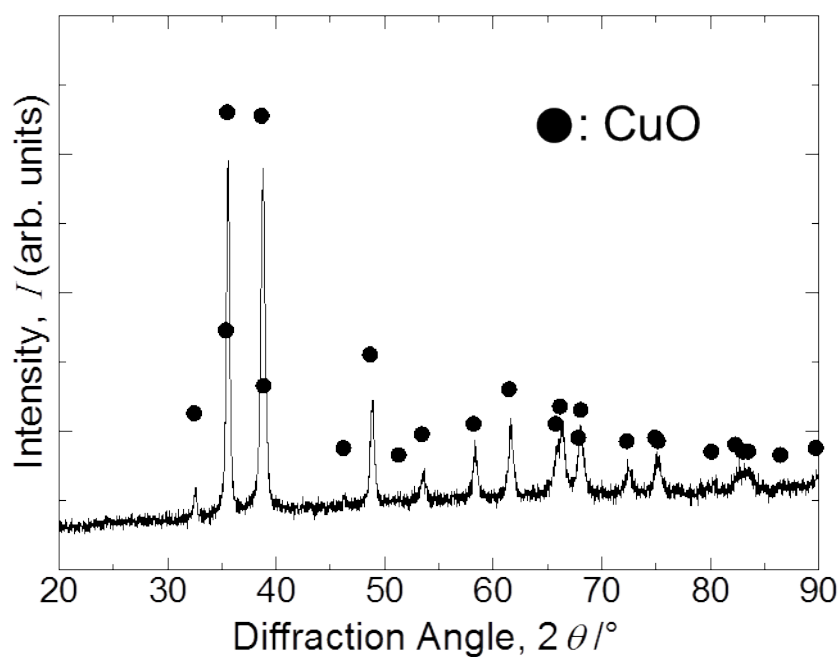

**Figure S1.** X-ray diffraction patterns of the sample calcined in argon at 800 °C followed by in air at 400 °C.

---

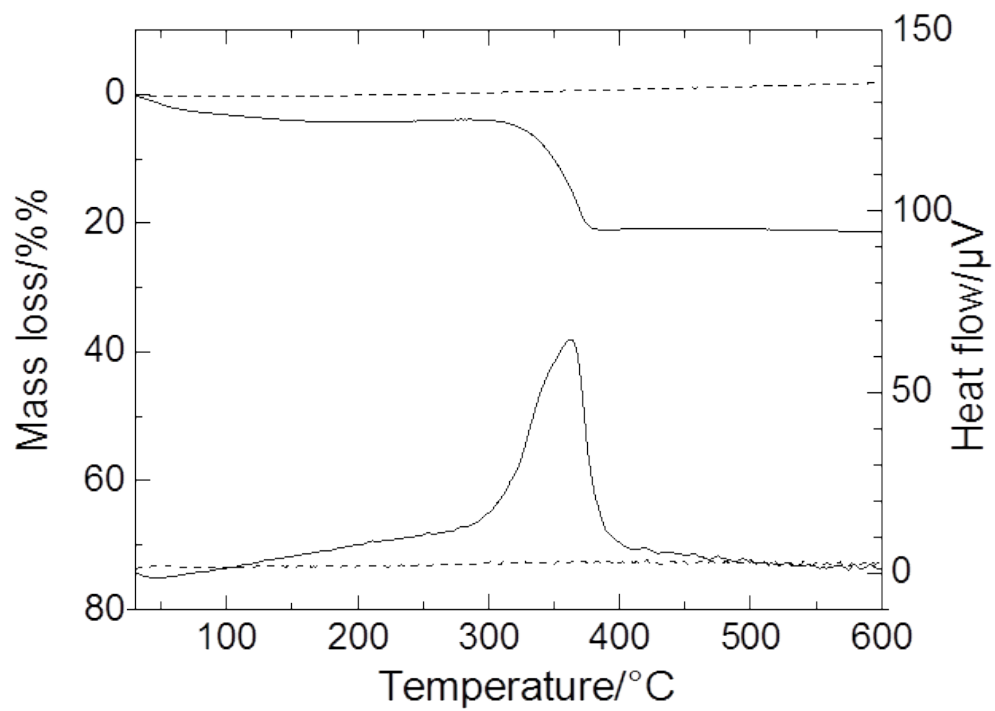

**Figure S2.** TG-DTA curves of the sample calcined in argon at 800 °C (solid line) and one calcined in argon at 800 °C followed by in air at 400 °C (dash line).

---
